# Supplementary material for: Operando spectroscopy unravels the nature of deactivating species and their precursors in alkene oligomerization catalysis
Source: Royal Society of Chemistry journal article supplement (doi:10.1039/d4cy01057d), 2024-12-06
Supplement: d4cy01057d1.pdf [file d4cy01057d1.pdf]

### Supplementary Information

## *Operando* Spectroscopy Unravels the Nature of Deactivating Species and their Precursors in Alkene Oligomerization Catalysis

Nibras Hijazi,<sup>ac</sup> Juan Carlos Navarro de Miguel,<sup>ac</sup> Jose Luis Cerrillo,<sup>a</sup> Rushana Khairova,<sup>a</sup> Xuan Gong,<sup>a</sup> Edy Abou-Hamad,<sup>b</sup> Javier Ruiz-Martínez,<sup>a</sup> and Jorge Gascon<sup>\*a</sup>

<sup>a</sup> KAUST Catalysis Center, King Abdullah University of Science and Technology, Thuwal 23955-6900, Kingdom of Saudi Arabia

<sup>b</sup> Imaging and Characterization Core Lab, KAUST Core Labs, King Abdullah University of Science and Technology, Thuwal 23955-6900, Kingdom of Saudi Arabia

<sup>c</sup> These authors contributed equally

\*To whom correspondence should be addressed: [jorge.gascon@kaust.edu.sa](mailto:jorge.gascon@kaust.edu.sa)

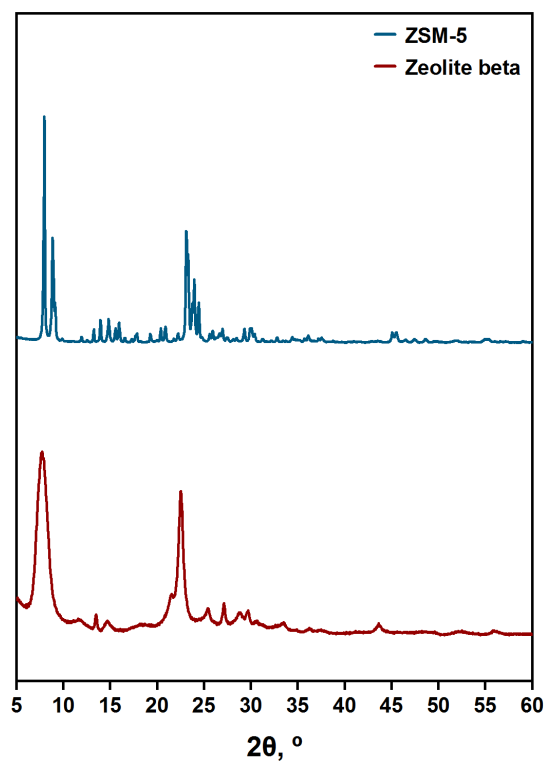

Fig. S1 XRD patterns of ZSM-5 and zeolite beta.

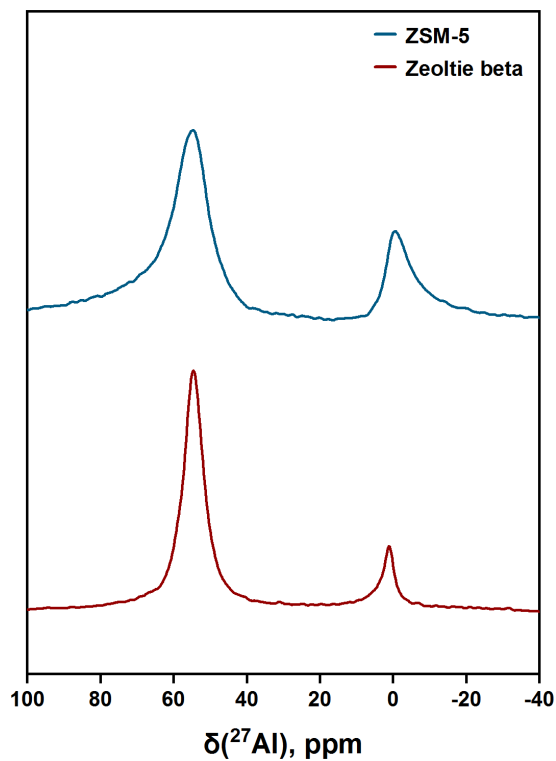

Fig. S2  $^{27}\text{Al}$  MAS NMR spectra of ZSM-5 and zeolite beta.

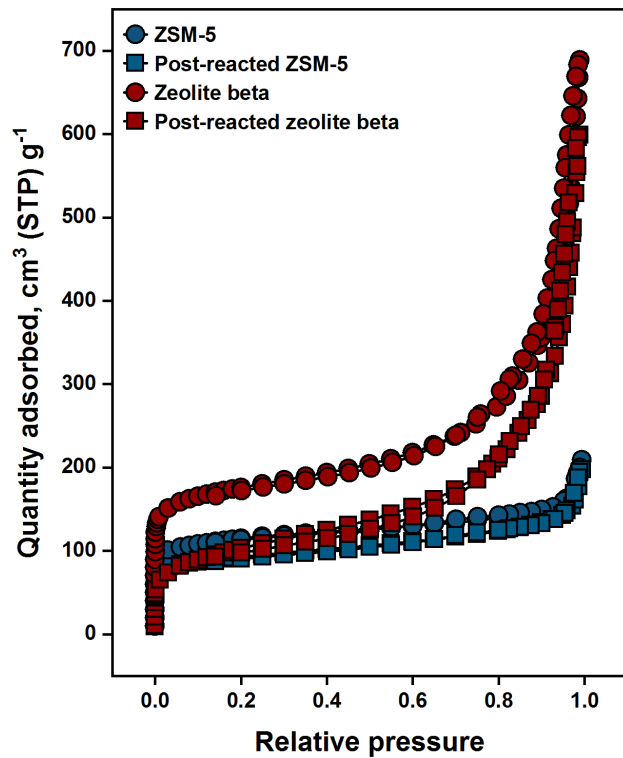

Fig. S3 Nitrogen physisorption isotherms measured on unreacted and post-reacted ZSM-5 and zeolite beta at 77 K.

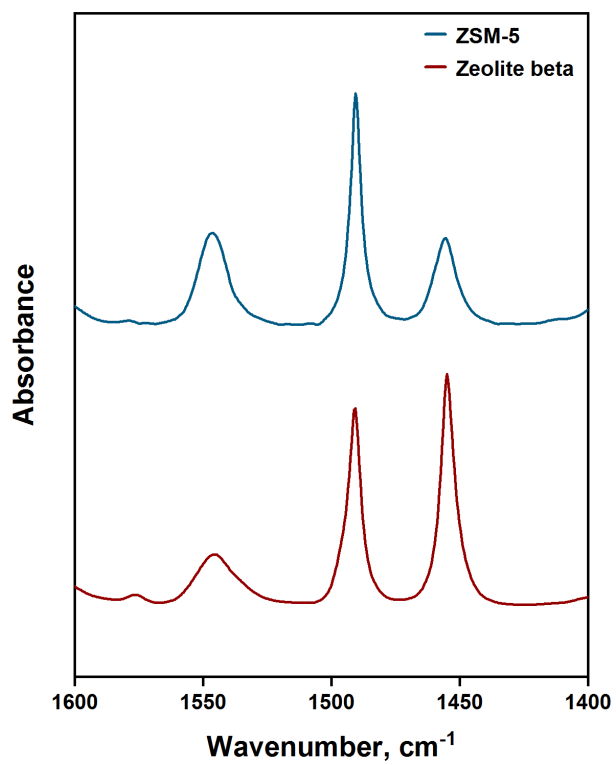

Fig. S4 Pyridine-FTIR spectra measured on ZSM-5 and zeolite beta.

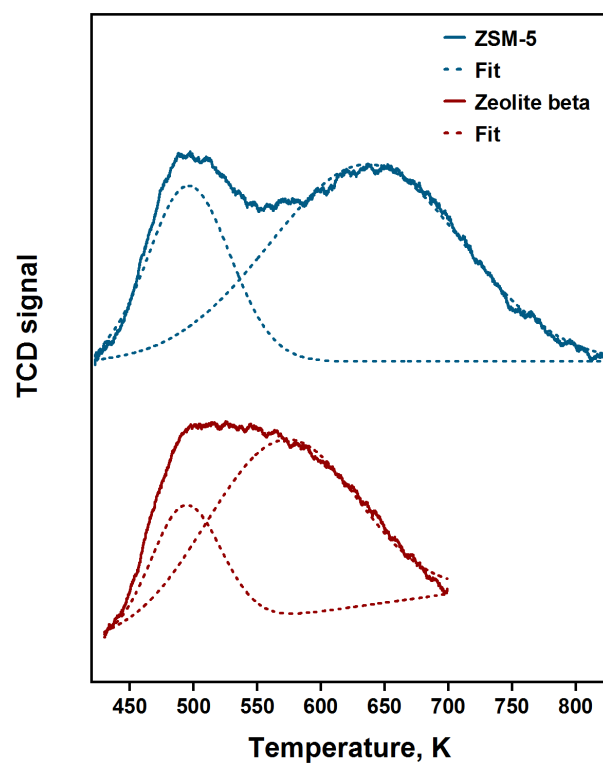

Fig. S5 NH<sub>3</sub>-TPD profiles measured on ZSM-5 and zeolite beta.

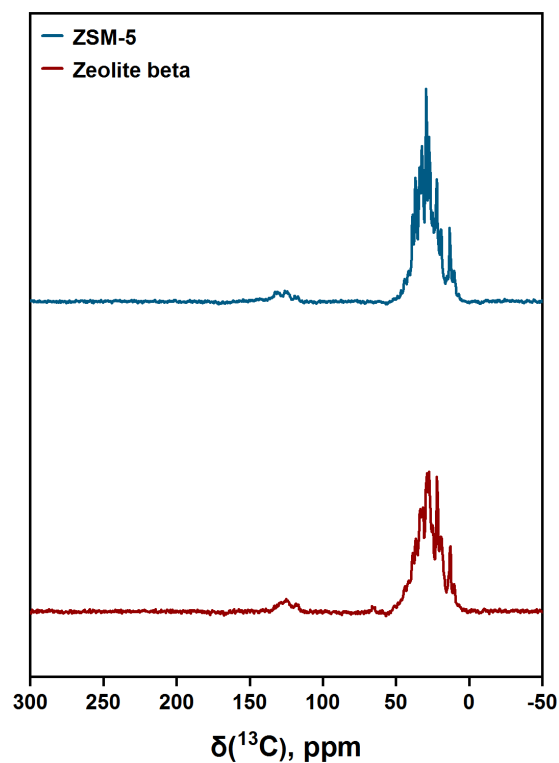

**Fig. S6** INEPT-based solid-state  $^{13}\text{C}$  NMR spectra of post-reacted ZSM-5 and zeolite beta. [523 K; 100 kPa propene pressure; 10-15 min TOS]. The spectra denote features of methyl and methylene groups (10-40 ppm) and olefinic groups (120-135 ppm).

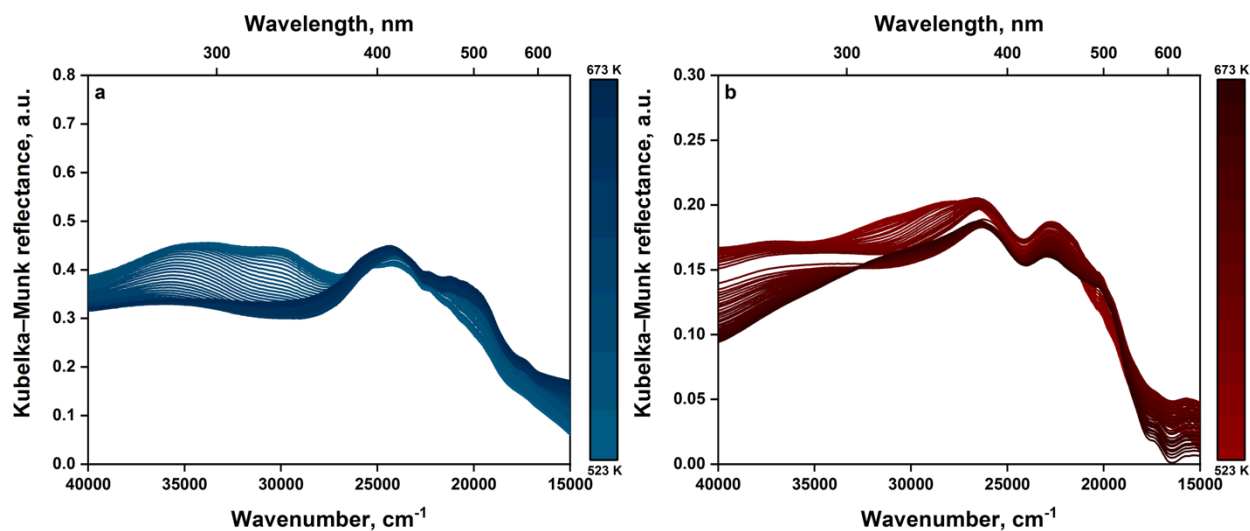

**Fig. S7** Kubelka-Munk reflectance of the UV-Vis bands measured during temperature-programmed experiments on (a) ZSM-5 and (b) zeolite beta.

**Table S1** Nitrogen physisorption measurements conducted on unreacted and post-reacted zeolites.

| Material                  | $S_{\text{Micropore}},^a$<br>$\text{m}^2 \text{g}^{-1}$ | $S_{\text{Mesopore}},^b$<br>$\text{m}^2 \text{g}^{-1}$ | $S_{\text{BET}},^c$<br>$\text{m}^2 \text{g}^{-1}$ | $V_{\text{Micropore}},^d$<br>$\text{cm}^3 \text{g}^{-1}$ | $V_{\text{Mesopore}},^e$<br>$\text{cm}^3 \text{g}^{-1}$ | $V_{\text{Total}},^f$<br>$\text{cm}^3 \text{g}^{-1}$ |
|---------------------------|---------------------------------------------------------|--------------------------------------------------------|---------------------------------------------------|----------------------------------------------------------|---------------------------------------------------------|------------------------------------------------------|
| ZSM-5                     | 269                                                     | 156                                                    | 425                                               | 0.11                                                     | 0.14                                                    | 0.25                                                 |
| Post-reacted ZSM-5        | 204                                                     | 136                                                    | 340                                               | 0.084                                                    | 0.15                                                    | 0.23                                                 |
| Zeolite beta              | 357                                                     | 281                                                    | 638                                               | 0.15                                                     | 0.74                                                    | 0.89                                                 |
| Post-reacted zeolite beta | 37                                                      | 318                                                    | 355                                               | 0.021                                                    | 0.62                                                    | 0.64                                                 |

<sup>a</sup> Micropore area. <sup>b</sup> Mesopore area. <sup>c</sup> BET surface area. <sup>d</sup> Micropore volume. <sup>e</sup> Mesopore volume. <sup>f</sup> Total pore volume measured at *ca.* 0.95 of relative pressure.
